# Supplementary material
Source: bioRxiv or medRxiv preprint supplement (https://medrxiv.org/highwire/filestream/97106/field_highwire_adjunct_files/0/2020.09.15.20192765-1.pdf)
Supplement: Supplementary file [file 2020.09.15.20192765-1.pdf]

Supplemental Figure 1  
Standard Operating Procedure

**Title: BU ELISA protocol for the detection of IgG, IgM, and IgA isotypes reactive with SARS-CoV-2 RBD**

**Date:** September 10<sup>th</sup>, 2020

**Prepared by:** Jennifer Snyder-Cappione and Rachel Yuen

**Purpose:** The purpose of this SOP is to provide a protocol for detecting the levels of IgG, IgM, and IgA SARS-CoV-2 RBD-specific antibodies in human serum and plasma samples.

**Requirements:** Liquid biological samples (serum or plasma) from human subjects

**Equipment:**

- (1) Biological Safety Cabinet – Class II or higher
- (2) Pipette aid
- (3) Single and Multi-channel pipettors: 1-1000ul
- (4) ELISA plate reader
- (5) Waste containers (i.e. bleach buckets, biohazard buckets)
- (6) Vortex

**Consumables:**

- (1) Serological Pipettes (5ml-25ml)
- (2) Pipette tips, sterile (10-1000ul)
- (3) ELISA plates (Pierce 96-Well Polystyrene Plates, corner notch) (ThermoFisher, cat#15041)
- (4) Plate sealers (ThermoFisher, cat#3501)
- (5) Polypropylene tubes (1.2ml-15ml)
- (6) Reagent reservoirs
- (7) Absorbent paper towels

**PPE:**

- (1) Lab coats that can fully button
- (2) Disposable nitrile gloves
- (3) Disposable cuffs

**Reagents and Reagent Preparation:**

Sterile reagents and sterile technique with proper BSL2 practices are required. Reagents should be stored as recommended by the manufacturer and only used until expiration date. Discard reagents that appear to have contamination.

- (1) Sterile 1x PBS, without calcium and magnesium (Gibco, cat# 14190144) or similar
- (2) Tween 20
- (3) Recombinant SARS-CoV-2 Receptor Binding Domain (RBD), recombinant (gift from Schmidt lab at Ragon Institute)
- (4) Casein blocking buffer in PBS (ThermoFisher, cat# 37528)
- (5) Anti-SARS-CoV-2 Monoclonal Antibodies: CR3022 IgG (gift from Ragon/Harvard), CR3022 IgA (Absolute Antibody, cat# Ab01680-16.0), BIB116 IgM (Creative Diagnostics, cat# CABT-CS044)
- (6) Wash Buffer 1
  - a. Sterile 1x PBS, no calcium and no magnesium
- (7) Wash Buffer 2

- a. Sterile 1x PBS, no calcium and no magnesium
- b. 0.05% Tween 20
- (8) HRP-conjugated anti-human antibodies (IgG, ThermoFisher, cat# A18817; IgM, ThermoFisher, cat# A18841; IgA, Jackson ImmunoResearch, cat# 109-035-011)
- (9) TMB-ELISA substrate solution (ThermoFisher, cat# 34029)
- (10) Sulfuric acid stop solution (ThermoFisher, cat#N600)
- (11) Disinfectant (i.e. 70% v/v ethanol disinfectant – spray bottle, 10% v/v bleach or 10% v/v Wescodyne – bucket or beaker)

### **Procedure:**

All work should be performed inside biological safety cabinets (BSC), level 2 or higher, at room temperature (15-30°C).

Spray down all surfaces, racks, and reagent bottles with 70% v/v ethanol prior to entering and using BSC.

*See Figure 1 for example of experimental plate layout.*

### **Step 1: Coating plates**

- (1) Dilute stock RBD to 2µg/ml in sterile 1x PBS in polypropylene tubes or directly in reagent reservoirs.
  - a. Vortex stock RBD for four seconds at max speed prior to removing aliquot for dilution. Next, mix coating solution with RBD thoroughly by pipetting 8 times with 10ml pipette or by vortexing if using polypropylene tubes.
- (2) Plate 50µl per well of prepared RBD or PBS as coating control with sterile tips, using caution to not touch the bottom of the wells.
- (3) Cover tightly with a plate sealer and gently tap plates on all sides, while rotating, to ensure complete coating of the wells.
- (4) Incubate for 1 hour at room temperature.

### **Washing Step: Perform the following procedure 3 times with Wash Buffer 1**

#### Washing Procedure Details:

Perform washing step one plate at a time using a multichannel pipettor.

- (1) Invert plate and flick out liquid into a waste container (a shallow rimmed tupperware, for example) lined with dry paper towels to prevent splashing of liquid.
- (2) Immediately add 200µl of washing solution (Buffer 1 or 2) to each well, careful to not touch the bottom of the wells with the pipette tips.
  - a. When the wash buffer is added to all wells necessary, lift the plate and gently tap 3 times to mix a bit, allow wash buffer to sit in plate for ~30 seconds, then repeat gentle tapping, and then flick out wash buffer into paper-towel lined waste container and bang plates on dry paper towels 3 times, rotate plate 180 degrees, bang 3 more times. Ensure liquid is removed but do not allow plates to sit dry.

### **Step 2: Blocking plates**

- (1) Add 200µl of casein blocking buffer per well.
- (2) Seal plate with a plate sealer and incubate for 30 minutes – 1.5 hours at room temperature.

### **Washing Step: Perform the Washing Procedure described above 3 times with Wash Buffer 1**

**Important:** When multiple plates are run simultaneously, plates can sit in Wash Buffer 1 until ready to add samples and must not be left dry.

### **Step 3: Add Samples**

Samples can be either serum or plasma. If stored at  $\leq -20^{\circ}\text{C}$ , allow to thaw completely at  $4^{\circ}\text{C}$  or on ice prior to use. It is recommended to not use samples that have undergone more than one freeze-thaw cycle.

- (1) Prepare samples and standards prior to adding to the plate in separate polypropylene tubes, such as cluster or microcentrifuge tubes.
  - a. Dilute samples in casein blocking buffer to 1:5, 1:10, 1:25, 1:125, 1:625, 1:3,125, 1:30,125 (dilutions may vary per experiment). Prepare standard curves using a 3-fold serial dilutions, starting at 1000ng/mL, in casein blocking buffer.
  - b. Mix samples/standards thoroughly by pipetting or vortexing between each dilution and using new tips every time transferring liquid from one dilution stock to another.
  - \* It is recommended to transfer prepared samples and standards to cluster tubes for ease of transfer to plates.
- (2) Add 50 $\mu\text{l}$  of prepared standard and sample dilution per well, as well as 50 $\mu\text{l}$  of casein blocking buffer per well to blank and zero standard wells (see Figure 1 plate map below).
  - \* Add samples quickly, gently pipette to mix each sample briefly prior to transfer to plates, using caution to not touch the bottom of the wells and be sure to change tips between transfer of all samples and standards.
- (3) After all samples are added to a plate, seal with a plate sealer and check for complete volume coverage of the bottoms of all wells; if necessary, gently tap plates on all sides, while rotating to distribute liquid.
- (4) Incubate plate(s) for 1 hour at room temperature.

**Washing Step: Perform the Washing Procedure described above 3 times with Wash Buffer 2**

Plates can sit in Wash Buffer 2 until ready to add diluted HRP-conjugated antibody preparations and must not be left dry.

#### Step 4: Add HRP-conjugated antibodies

- (1) Prepare HRP-conjugated antibodies using casein blocking buffer as diluent in polypropylene tubes. Mix stocks and diluted solutions thoroughly by pipetting or vortexing.
  - a. IgM – 1:8,000 dilution
  - b. IgG – 1:2,000 dilution
  - c. IgA – 1:2,000 dilution
- (2) Add 50 $\mu\text{L}$  per well of prepared HRP-conjugated antibodies to corresponding wells.
- (3) Seal with a new plate sealer and check for complete volume coverage of the bottoms of all wells; if necessary, gently tap plates on all sides, while rotating to distribute liquid.
- (4) Incubate for 30 minutes at room temperature.

**Washing Step: Perform the Washing Procedure described above 4 times with Wash Buffer 2**

Plates can sit in Wash Buffer 2 until ready to add substrate solution and must not be left dry.

#### Step 5: Development of Plates and Addition of Stop Solution

- (1) Add 50 $\mu\text{l}$  of TMB-ELISA substrate solution to each well.
  - \* TMB-ELISA substrate solution should be equilibrated to room temperature prior to use.
  - \* Check for complete volume coverage of the bottoms of all wells; if necessary, gently tap plates on all sides, while rotating to distribute liquid.
- Incubate until visible color difference is seen between most diluted standard (dilution 7) and casein blocking buffer only well; multiple reads at 652nm can be taken before stopping assay to development is complete. Typical range of development time is ~8-20minutes.
- Stop reaction by adding 50 $\mu\text{l}$  of sulfuric acid stop solution to each well.

Step 6: Read Plates on Microplate reader

(1) Measure absorbance at 450nm.

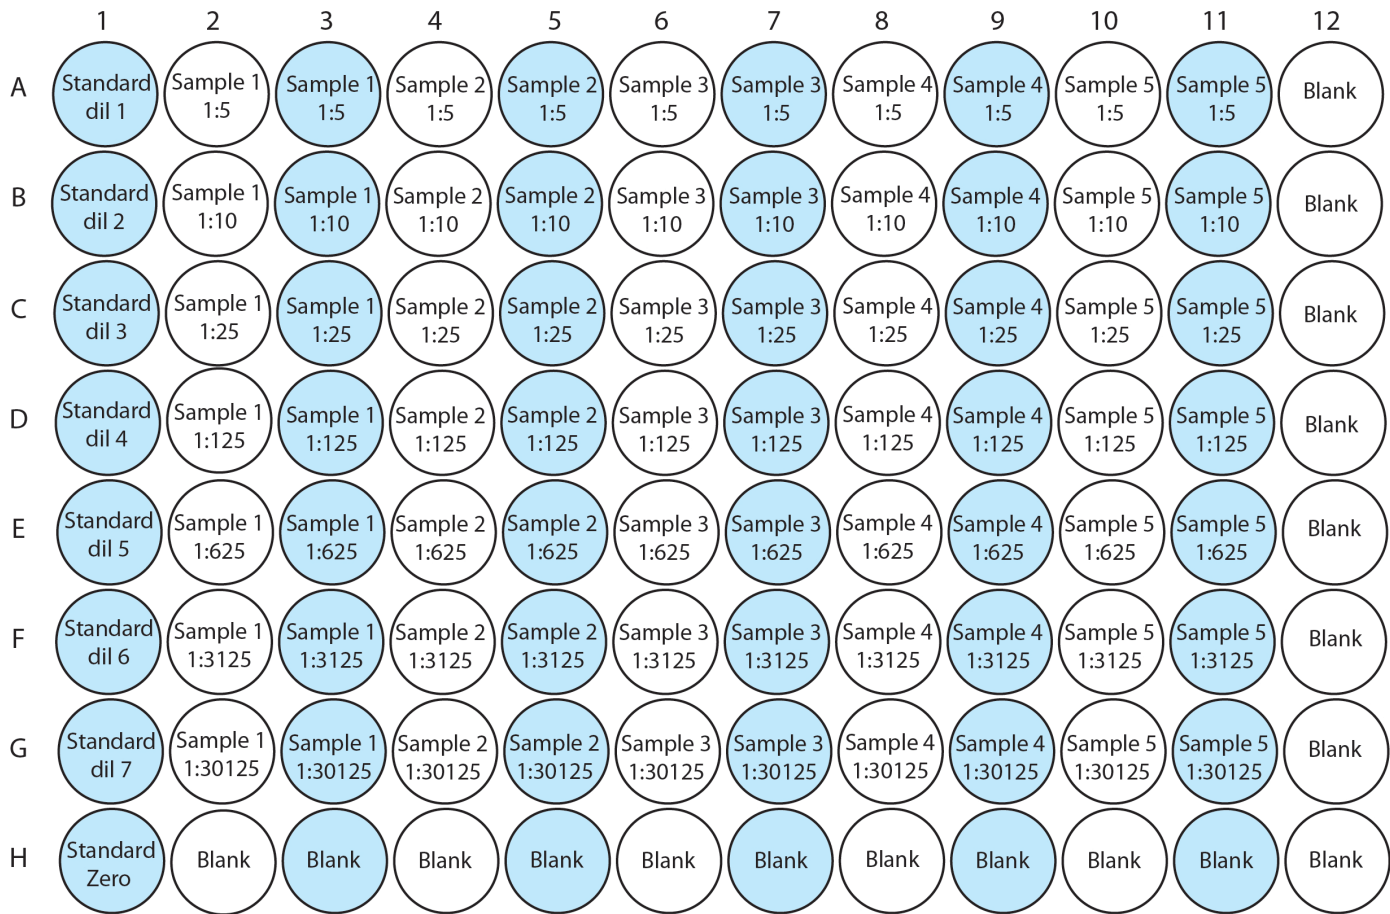

| Standard | Concentration (ng/mL)       |
|----------|-----------------------------|
| dil 1    | 1000.00                     |
| dil 2    | 333.33                      |
| dil 3    | 111.11                      |
| dil 4    | 37.04                       |
| dil 5    | 12.35                       |
| dil 6    | 4.12                        |
| dil 7    | 1.37                        |
| zero     | casein blocking buffer only |

Figure 1. Example experimental plate layout.
